# Supplementary material for: The SGLT2 inhibitor empagliflozin in patients hospitalized for acute heart failure: a multinational randomized trial
Source: Nat Med. 2022 Feb 28;28(3):568–74. doi: 10.1038/s41591-021-01659-1 (PMC8938265; doi:10.1038/s41591-021-01659-1)
Supplement: Supplementary file 1 — Supplementary Tables 1–4. [file 41591_2021_1659_MOESM1_ESM.pdf]

---

**Supplementary information**

---

**The SGLT2 inhibitor empagliflozin in patients hospitalized for acute heart failure: a multinational randomized trial**

---

In the format provided by the  
authors and unedited

## **SUPPLEMENTARY INFORMATION FOR THE EMPULSE TRIAL**

### **CONTENTS**

|                                                                                                                                                                                                |          |
|------------------------------------------------------------------------------------------------------------------------------------------------------------------------------------------------|----------|
| <b>SUPPLEMENTARY TABLE 1. REASONS FOR SCREENING FAILURE .....</b>                                                                                                                              | <b>2</b> |
| <b>SUPPLEMENTARY TABLE 2. SUMMARY OF ADVERSE EVENTS.....</b>                                                                                                                                   | <b>3</b> |
| <b>SUPPLEMENTARY TABLE 3. DETAILS ON RENAL AND URINARY ADVERSE EVENTS.....</b>                                                                                                                 | <b>4</b> |
| <b>SUPPLEMENTARY TABLE 4. CHANGES IN HEMATOCRIT, HEMOGLOBIN, ALANINE<br/>AMINOTRANSFERASE (ALT), ASPARTATE TRANSAMINASE (AST), URIC ACID AND ESTIMATED<br/>GLOMERULAR FILTRATION RATE.....</b> | <b>5</b> |

**SUPPLEMENTARY TABLE 1. REASONS FOR SCREENING FAILURE**

| Reason                                                         | Total<br>N (%) |
|----------------------------------------------------------------|----------------|
| Not randomized                                                 | 36 (100%)      |
| Adverse event                                                  | 1 (2.8%)       |
| Inclusion / exclusion criteria not met*                        | 30 (83.3%)     |
| Conditions on NT-proBNP not met                                | 7 (19.4%)      |
| Patient not hemodynamically stabilized                         | 5 (13.9%)      |
| Primary diagnosis is acute HF not triggered by volume overload | 2 (5.6%)       |
| Missing                                                        | 16 (44.4%)     |
| Lost to follow-up                                              | 0              |
| Consent withdrawn (not due to an adverse event)                | 1 (2.8%)       |
| Other                                                          | 4 (11.1%)      |

\* Patients may have not met more than one in/exclusion criterion.

**SUPPLEMENTARY TABLE 2. SUMMARY OF ADVERSE EVENTS**

| Category of AEs                                    | Empagliflozin 10 mg<br>N (%) | Placebo<br>N (%) |
|----------------------------------------------------|------------------------------|------------------|
| Number of patients                                 | 260 (100.0)                  | 264 (100.0)      |
| Patients with any AEs                              | 182 (70.0)                   | 204 (77.3)       |
| Severe AEs                                         | 39 (15.0)                    | 54 (20.5)        |
| Investigator defined drug-related AEs              | 30 (11.5)                    | 27 (10.2)        |
| AEs leading to discontinuation of study medication | 22 (8.5)                     | 34 (12.9)        |
| Serious AEs                                        | 84 (32.3)                    | 115 (43.6)       |
| Results in death                                   | 9 (3.5)                      | 17 (6.4)         |
| Is life threatening                                | 12 (4.6)                     | 14 (5.3)         |
| Persistent or significant disability/incapacity    | 0                            | 1 (0.4)          |
| Requires or prolongs hospitalization               | 64 (24.6)                    | 87 (33.0)        |
| Congenital anomaly or birth defect                 | 0                            | 0                |
| Other medically important serious event            | 33 (12.7)                    | 48 (18.2)        |
| AEs of special interest                            |                              |                  |
| Hepatic injury (narrow SMQ)                        | 10 (3.8)                     | 13 (4.9)         |
| Acute renal failure (narrow SMQ)                   | 20 (7.7)                     | 32 (12.1)        |
| Ketoacidosis (narrow SMQ)                          | 0                            | 0                |

Percentages calculated using total number of patients per treatment as the denominator.

A patient may be counted in more than one seriousness criterion.

**SUPPLEMENTARY TABLE 3. DETAILS ON RENAL AND URINARY ADVERSE EVENTS**

| MedDRA PT                                      | Empagliflozin 10 mg |                 | Placebo     |                 |
|------------------------------------------------|---------------------|-----------------|-------------|-----------------|
|                                                | N (%)               | Rate/100 pt-yrs | N (%)       | Rate/100 pt-yrs |
| Number of patients                             | 260 (100.0)         |                 | 264 (100.0) |                 |
| Acute renal failure (narrow SMQ) <sup>1</sup>  | 20 (7.7)            | 34.69           | 32 (12.1)   | 55.69           |
| Acute kidney injury                            | 10 (3.8)            | 16.90           | 19 (7.2)    | 32.28           |
| Renal impairment                               | 9 (3.5)             | 15.38           | 11 (4.2)    | 18.58           |
| Renal failure                                  | 2 (0.8)             | 3.34            | 2 (0.8)     | 3.33            |
| Serious                                        | 12 (4.6)            | 20.37           | 23 (8.7)    | 39.35           |
| Leading to discontinuation of study medication | 6 (2.3)             | 10.02           | 4 (1.5)     | 6.64            |
| Urinary tract infection                        | 11 (4.2)            | 18.80           | 17 (6.4)    | 29.23           |
| Cystitis                                       | 8 (3.1)             | 13.62           | 5 (1.9)     | 8.36            |
| Urinary tract infection                        | 3 (1.2)             | 5.01            | 6 (2.3)     | 10.10           |
| Urinary tract infection bacterial              | 1 (0.4)             | 1.67            | 6 (2.3)     | 10.07           |
| Escherichia urinary tract infection            | 1 (0.4)             | 1.67            | 0           | -               |
| Bacteriuria                                    | 0                   | -               | 1 (0.4)     | 1.66            |
| Complicated <sup>2</sup>                       | 1 (0.4)             | 1.67            | 2 (0.8)     | 3.33            |

<sup>1</sup> Using standard MedDRA query v24.0 definition for Acute renal Failure consist of 19 preferred terms including acute kidney injury, subacute kidney injury, anuria, oliguria, azotemia, renal failure, renal impairment, haemodialysis, haemofiltration, peritoneal dialysis

<sup>2</sup> Complicated UTI: Renal infections or Urosepsis or serious urinary tract infections.

**SUPPLEMENTARY TABLE 4. CHANGES IN HEMATOCRIT, HEMOGLOBIN, ALANINE AMINOTRANSFERASE (ALT), ASPARTATE TRANSAMINASE (AST), URIC ACID AND ESTIMATED GLOMERULAR FILTRATION RATE**

|                                                        | <b>Empagliflozin 10 mg</b> | <b>Placebo</b>       |
|--------------------------------------------------------|----------------------------|----------------------|
| Number of patients                                     | 260                        | 264                  |
| <b>Hematocrit [%]</b>                                  |                            |                      |
| Number of analyzed patients                            | 212                        | 217                  |
| Baseline mean (SE)                                     | 40.32 (0.42)               | 40.87 (0.43)         |
| Change from baseline at Day 90 adjusted mean (95% CI)  | 0.07 (-0.51, 0.64)         | -1.87 (-2.46, -1.28) |
| Comparison vs placebo at Day 90 adjusted mean (95% CI) | 1.94 (1.11, 2.76)          |                      |
|                                                        |                            |                      |
| <b>Hemoglobin [g/dL]</b>                               |                            |                      |
| Number of analyzed patients                            | 214                        | 223                  |
| Baseline mean (SE)                                     | 13.21 (0.14)               | 13.40 (0.14)         |
| Change from baseline at Day 90 adjusted mean (95% CI)  | 0.23 (0.04, 0.41)          | -0.41 (-0.60, -0.22) |
| Comparison vs placebo at Day 90 adjusted mean (95% CI) | 0.64 (0.37, 0.90)          |                      |
|                                                        |                            |                      |
| <b>ALT [U/L]</b>                                       |                            |                      |
| Number of analyzed patients                            | 213                        | 216                  |
| Baseline mean (SE)                                     | 28.8 (2.1)                 | 28.4 (2.2)           |
| Change from baseline at Day 90 adjusted mean (95% CI)  | -7.5 (-13.1, -1.9)         | -2.9 (-8.7, 2.9)     |
| Comparison vs placebo at Day 90 adjusted mean (95% CI) | -4.7 (-12.7, 3.4)          |                      |
|                                                        |                            |                      |
| <b>AST [U/L]</b>                                       |                            |                      |
| Number of analyzed patients                            | 210                        | 211                  |
| Baseline mean (SE)                                     | 28.2 (1.8)                 | 25.5 (1.1)           |
| Change from baseline at Day 90 adjusted mean (95% CI)  | -3.8 (-9.5, 2.0)           | 2.1 (-3.9, 8.2)      |
| Comparison vs placebo at Day 90 adjusted mean (95% CI) | -5.9 (-14.3, 2.4)          |                      |
|                                                        |                            |                      |
| <b>Uric acid [mg/dL]</b>                               |                            |                      |
| Number of analyzed patients                            | 222                        | 225                  |
| Baseline mean (SE)                                     | 8.62 (0.17)                | 8.58 (0.15)          |
| Change from baseline at Day 90 adjusted mean (95% CI)  | -1.96 (-2.24, -1.69)       | -0.82 (-1.10, -0.54) |
| Comparison vs placebo at Day 90 adjusted mean (95% CI) | -1.15 (-1.54, -0.75)       |                      |
|                                                        |                            |                      |
| <b>eGFR [mL/min/1.73m<sup>2</sup>]</b>                 |                            |                      |
| Number of analyzed patients                            | 220                        | 225                  |
| Baseline mean (SE)                                     | 52.7 (1.3)                 | 56.4 (1.4)           |
| Change from baseline at Day 90 adjusted mean (95% CI)  | 1.9 (-0.2, 4.1)            | 1.1 (-1.2, 3.3)      |
| Comparison vs placebo at Day 90 adjusted mean (95% CI) | 0.9 (-2.2, 4.0)            |                      |
